# Supplementary material
Source: PubMed Central journal article supplement (PMC4773915)

**Supplementary Table 1: Full MHC typing of the cynomolgus monkeys used in the experiments**

**Supplementary Figure 1: Detection of ex-vivo expanded Treg added to blood.** The limit of detection and quantitation of exogenous (ex) Treg was assessed by addition of graded numbers of CFSE- or VPD450-labeled expanded Treg to 1ml normal cynomolgus whole blood, followed by analysis of the added Treg and endogenous CD4<sup>+</sup> T effector (Teff) and Treg cells in PBMC by flow cytometry. Counting beads were added before running flow analysis. Cell numbers per ml blood were calculated as the number of cell events/number of bead events x total number of beads added. (A) Gating strategy used to identify exogenous (ex) Treg and endogenous (end) CD4<sup>+</sup> Teff and Treg. (B). Absolute number of ex Treg, as well as end Treg and end Teff cells detected in 1ml blood versus the number of expanded Treg added to the 1ml blood. Data are means  $\pm$  1SD from 3 independent experiments.

**Supplementary Figure 2: Ki67 expression by infused Treg and endogenous T cells.** Ex vivo-expanded Treg were labeled with CFSE or VPD450 before infusion. At 30 min and 1 day post-infusion, peripheral blood from two IS monkeys was tested for Ki67 expression by exogenous auto- and non-auto Treg and endogenous (end) Treg and Teff.

# Supplementary Figure 1

A

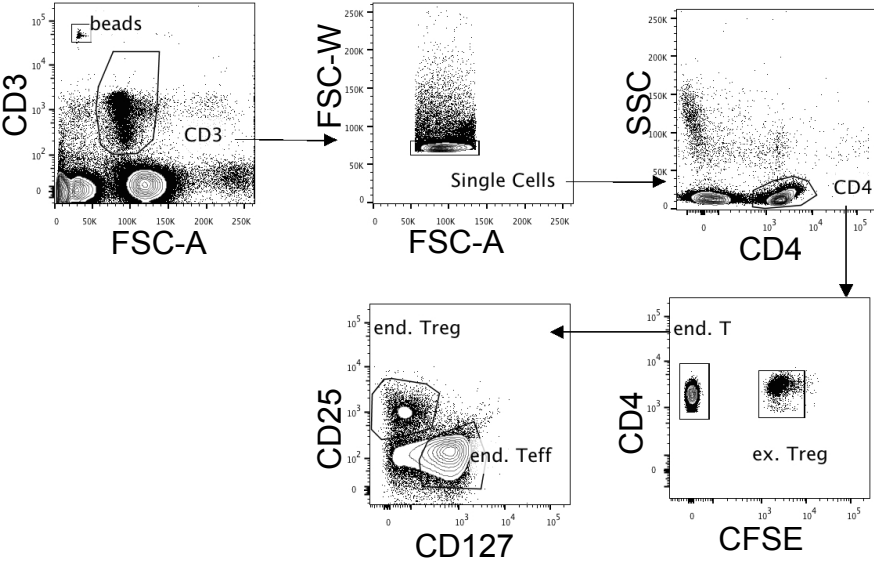

B

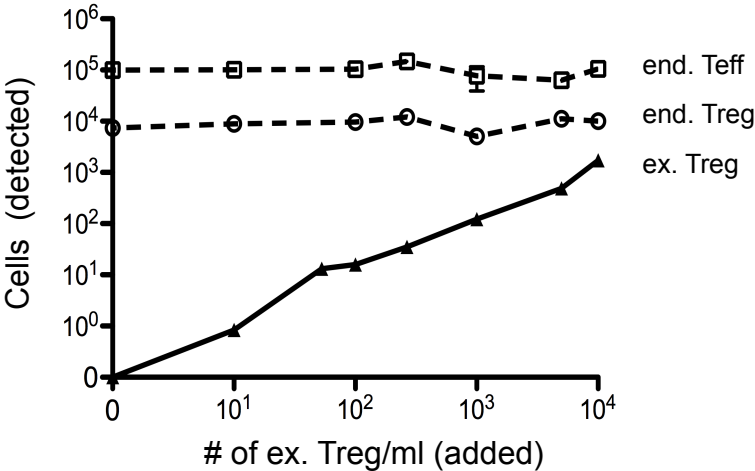

# Supplementary Figure 2

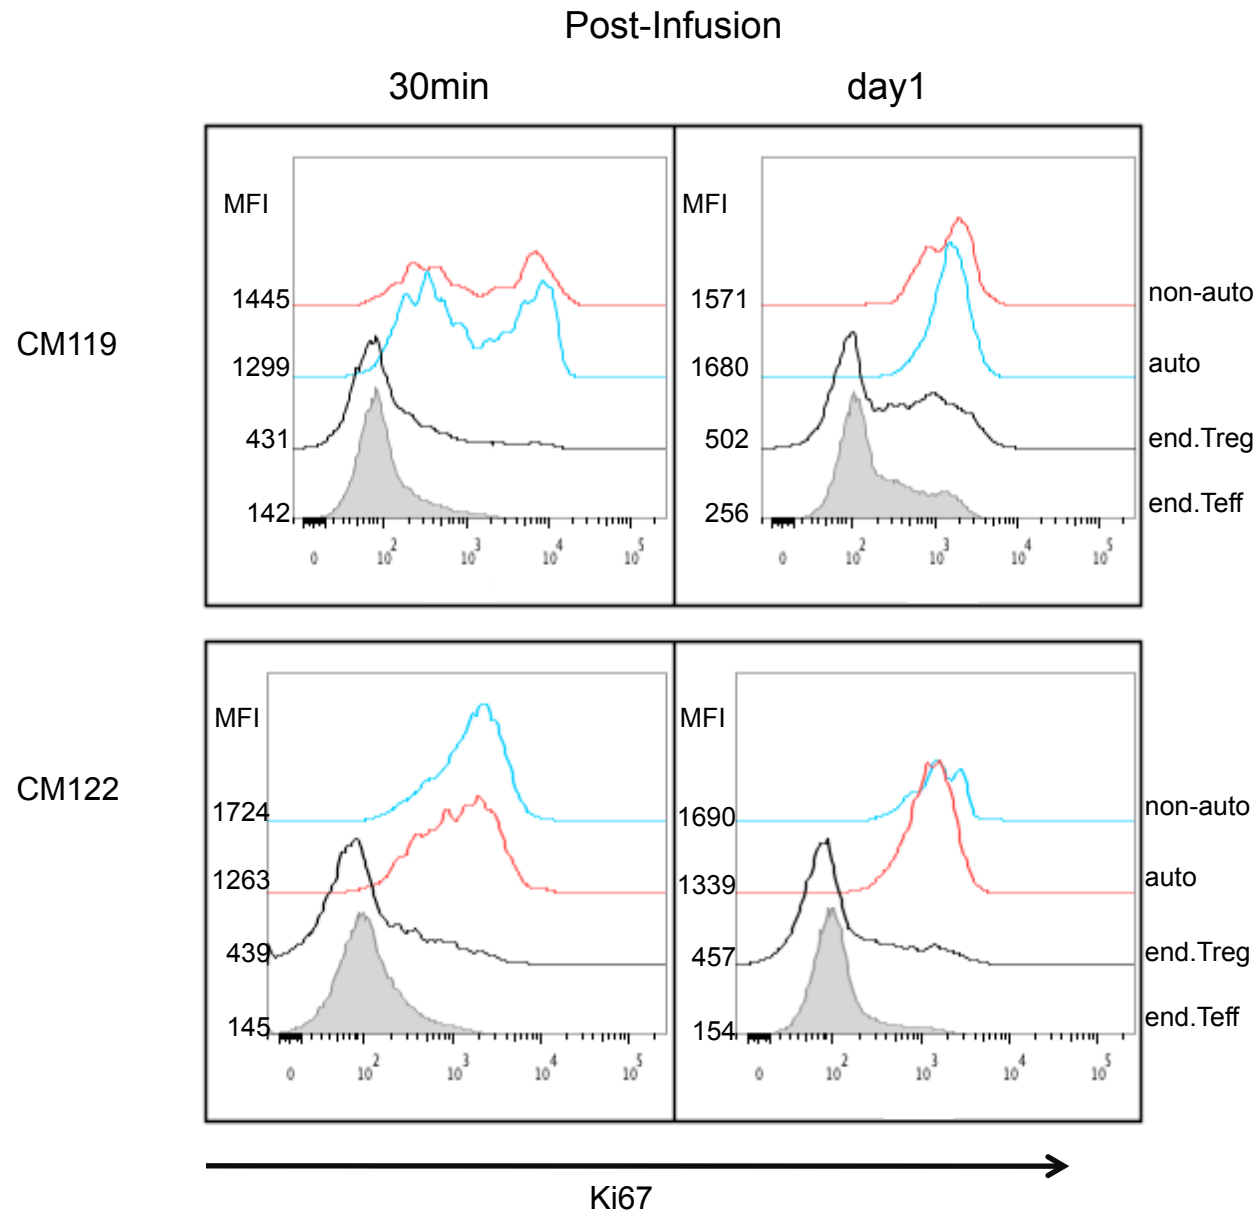

Supplement: NIHMS762416-supplement-01.pdf [file NIHMS762416-supplement-01.pdf]
